# Supplementary material for: Effects of 10-Day Complete Fasting on Physiological Homeostasis, Nutrition and Health Markers in Male Adults
Source: MDPI journal article supplement (doi:10.3390/nu14183860), 2022-09-18
Supplement: s1 [file s1]

Supplement table and figure.

Table S1 the results of 17 blood routine parameters

|        | BF           | CF3          | CF6          | CF9          | CR3          | FR5          |
|--------|--------------|--------------|--------------|--------------|--------------|--------------|
| WBC    | 6.01±1.71    | 6.61±2.31    | 6.01±1.81    | 6.01±2.11    | 5.01±1.21    | 5.31±1.31    |
| LYM    | 2.01±0.51    | 2.01±0.71    | 1.91±0.61    | 1.91±0.51    | 1.91±0.41    | 1.81±0.51    |
| LYM%   | 34.01±5.71   | 30.41±6.71   | 31.51±5.81   | 34.11±8.61   | 38.31±8.71   | 35.81±6.81   |
| EO     | 0.21±0.21    | 0.11±0.11    | 0.21±0.21    | 0.21±0.21    | 0.21±0.21    | 0.21±0.11    |
| EO%    | 3.61±2.41    | 2.41±1.91    | 3.11±3.11    | 3.61±3.11    | 4.31±3.01    | 4.21±2.51    |
| BASO   | 0.01±0.01    | 0.01±0.01    | 0.01±0.01    | 0.11±0.01    | 0.01±0.01    | 0.01±0.01    |
| BASO%  | 0.61±0.21    | 0.51±0.21    | 0.71±0.31    | 0.91±0.31    | 0.71±0.31    | 0.41±0.51    |
| MCV    | 91.21±7.61   | 91.31±8.21   | 90.81±8.11   | 88.31±6.81   | 87.61±7.41   | 92.21±6.91   |
| MCH    | 31.21±2.81   | 31.31±2.71   | 30.51±3.81   | 29.91±2.41   | 30.41±2.41   | 30.01±2.31   |
| MCHC   | 342.21±10.11 | 342.71±13.31 | 345.51±13.01 | 338.81±11.41 | 346.81±12.21 | 325.51±9.11  |
| RDW-SD | 41.61±6.81   | 41.41±7.01   | 41.31±6.21   | 39.21±4.91   | 39.21±5.31   | 42.81±5.31   |
| RDW-CV | 12.51±0.91   | 12.31±0.91   | 12.41±0.71   | 12.11±0.61   | 12.31±0.71   | 13.01±0.91   |
| PLT    | 247.21±55.71 | 261.51±40.91 | 277.51±41.41 | 280.51±45.01 | 235.51±47.01 | 240.31±54.71 |
| PDW    | 12.61±1.21   | 12.61±1.31   | 13.01±1.21   | 12.81±1.31   | 10.31±1.11   | 13.81±1.41   |
| MPV    | 10.61±0.61   | 10.61±0.61   | 10.81±0.51   | 10.61±0.51   | 9.51±0.61    | 11.11±0.61   |
| PLCR   | 29.81±4.91   | 29.71±4.81   | 31.61±4.61   | 30.21±4.31   | 21.81±4.71   | 33.31±4.11   |
| PCT    | 0.31±0.11    | 0.31±0.01    | 0.31±0.01    | 0.31±0.01    | 0.21±0.01    | 0.31±0.11    |

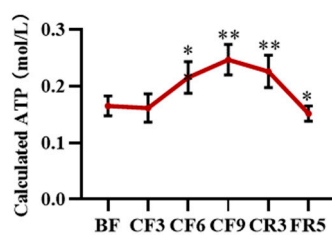

Figure S1 the calculated ATP level during the experiment. \*  $p < 0.05$ , \*\*  $p < 0.01$  VS. BF;  $n = 13$ . BF: before fasting, CF: complete fasting, CR: calorie restriction, FR: fully recovery, the number presents days.
